# Supplementary material for: Relaxation dynamics transition near the dry-wet transition in foams
Source: Research Square preprint supplement (doi:10.21203/rs.3.rs-2062708/v2), 2022-11-15
Supplement: Supplementary file 1 [file ae28a19645065a2ce76d4aaa.pdf]

## Supplementary Information for

### “Relaxation dynamics transition near the dry-wet transition in foams”

Naoya Yanagisawa and Rei Kurita

Department of Physics, Tokyo Metropolitan University, Tokyo 192-0397, Japan

**(Supplementary movie 1) Movie of the relaxation process for  $\phi_{2D} = 0.034$ .**

Playback is at 10x speed.

**(Supplementary movie 2) Movie of the relaxation process for  $\phi_{2D} = 0.066$ .**

Playback is at 25x speed.

**(Supplementary movie 3) Movie of a single sequential rearrangement event seen during the relaxation process for  $\phi_{2D} = 0.042$ .**

Playback is at 5x speed.

**(Supplementary movie 4) Movie of a single collective rearrangement event seen during the relaxation process for  $\phi_{2D} = 0.066$ .**

Playback is at 10x speed.

**(Supplementary movie 5) Movie of a single sequential rearrangement event seen during the relaxation process in a three-dimensional foam for  $\phi = 0.13$ .**

Playback is at 2x speed. The foam contains several bubbles in the sample cell thickness direction. The liquid fraction  $\phi$  is obtained using  $\phi = V_{liquid} / V_{foam} = m / \rho h S_{foam}$ , where  $V_{liquid}$ ,  $V_{foam}$ ,  $m$ ,  $\rho$ ,  $h$ , and  $S_{foam}$  are the volume of liquid, the volume of the foam, the mass of liquid, the density of the liquid, the sample cell thickness and the area of the foam, respectively.

**(Supplementary movie 6) Movie of a single collective rearrangement event seen during the relaxation process in a three-dimensional foam for  $\phi = 0.28$ .**

Playback is at 2x speed.

### Definition of the characteristic length $\xi$ of a relaxation event

A relaxation event involves multiple bubbles; there is a characteristic length associated with the event. Fig.S1 shows traces of the positions of the bubbles over time for  $\phi_{2D} = 0.042$ . Here, the characteristic length  $\xi$  of this event is defined as the furthest distance between two rearranged bubbles.

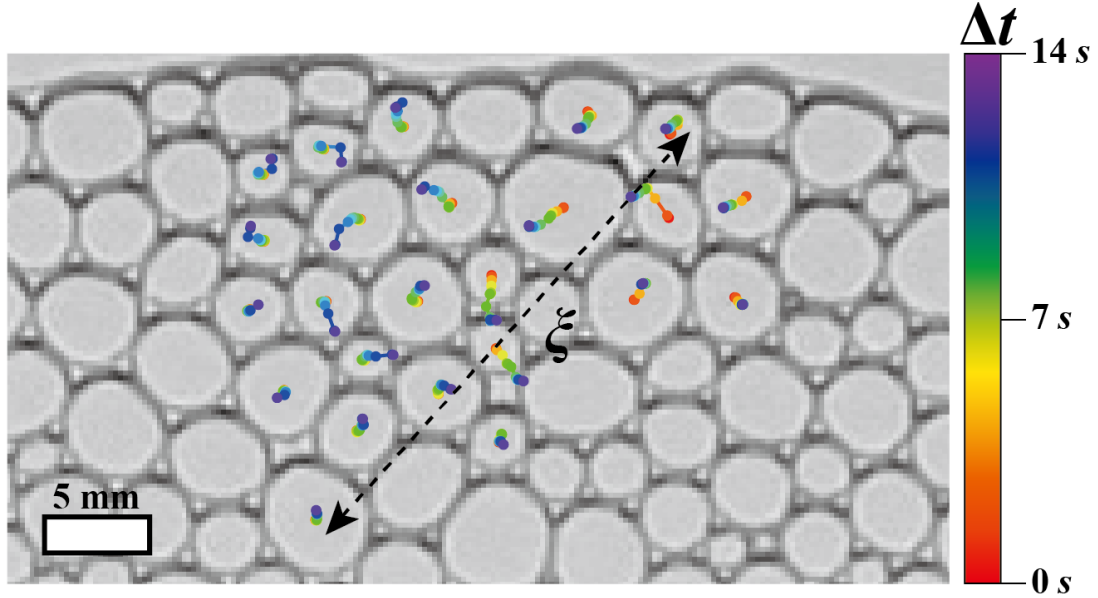

**Fig. S1.** Tracking of the positions of bubbles involved in a relaxation event for  $\phi_{2D} = 0.042$ . The characteristic length  $\xi$  of this event is defined as the furthest distance between two rearranged bubbles.

### The effect of the anisotropy in surface tension on the outside of the foam

In order to confirm whether the anisotropy in surface tension on the outside of the foam affects the sequential rearrangement of bubbles, we investigate the case where the shape of the entire foam is elliptical. Figure S2 shows the image of an elliptical-shaped foam at  $\phi_{2D} = 0.021$ .  $a$  and  $b$  represent the lengths of the major and minor axes of the ellipse, respectively. Here, we introduce the flattening  $f$  of the foam, which is the compression factor of a circle along a diameter to form an ellipse, as defined by  $f = 1 - b/a$ . Figure S3 shows  $f$  as a function of  $\phi_{2D}$ . We find that  $f$  decreases as  $\phi_{2D}$  increases. Figure S4(a) and (b) show the mean relaxation time  $\tau$  and correlation length  $\xi$  of a single sequential rearrangement event averaged over several sequential rearrangements as a function of  $\phi_{2D}$ , respectively. We find that both  $\tau$  and  $\xi$  increase continuously as  $\phi_{2D}$  increases. This result is consistent with when the shape of the entire foam is circular, the main focus of this paper. Thus, we show that the anisotropy in surface tension on the outside of the foam does not affect sequential rearrangement events.

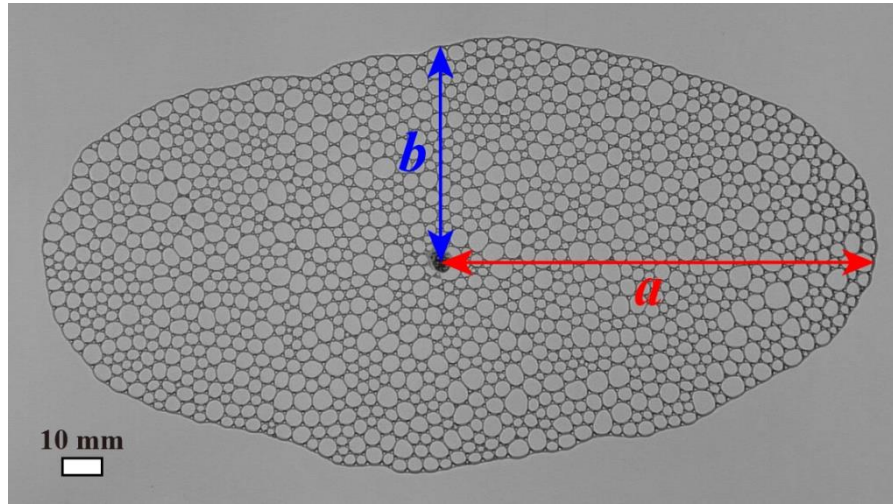

**Fig. S2.** Image of an elliptical foam at  $\phi_{2D} = 0.021$ .  $a$  and  $b$  represent the lengths of the major and minor axes of the ellipse, respectively.

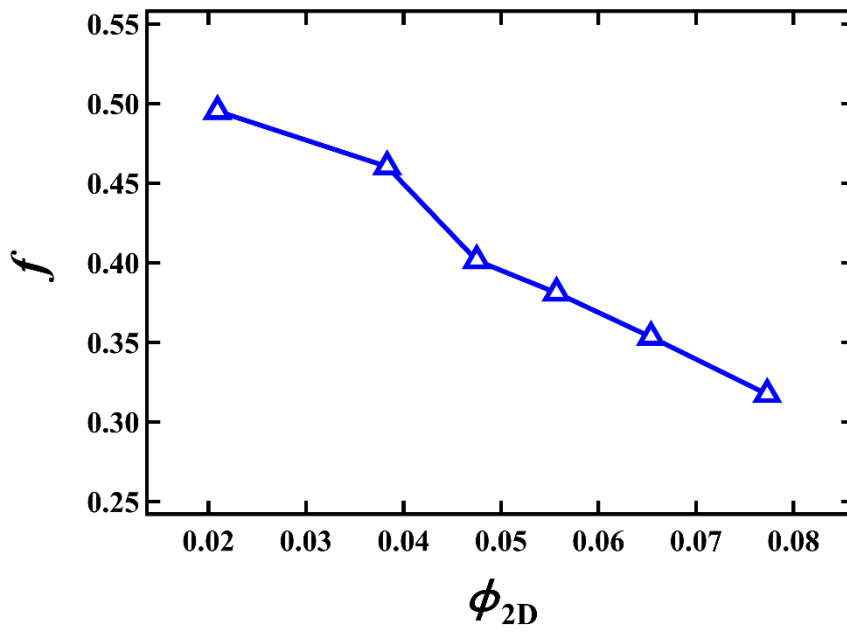

**Fig. S3.** Flattening  $f$  of the foam as a function of  $\phi_{2D}$ . It is found that  $f$  decreases as  $\phi_{2D}$  increases.

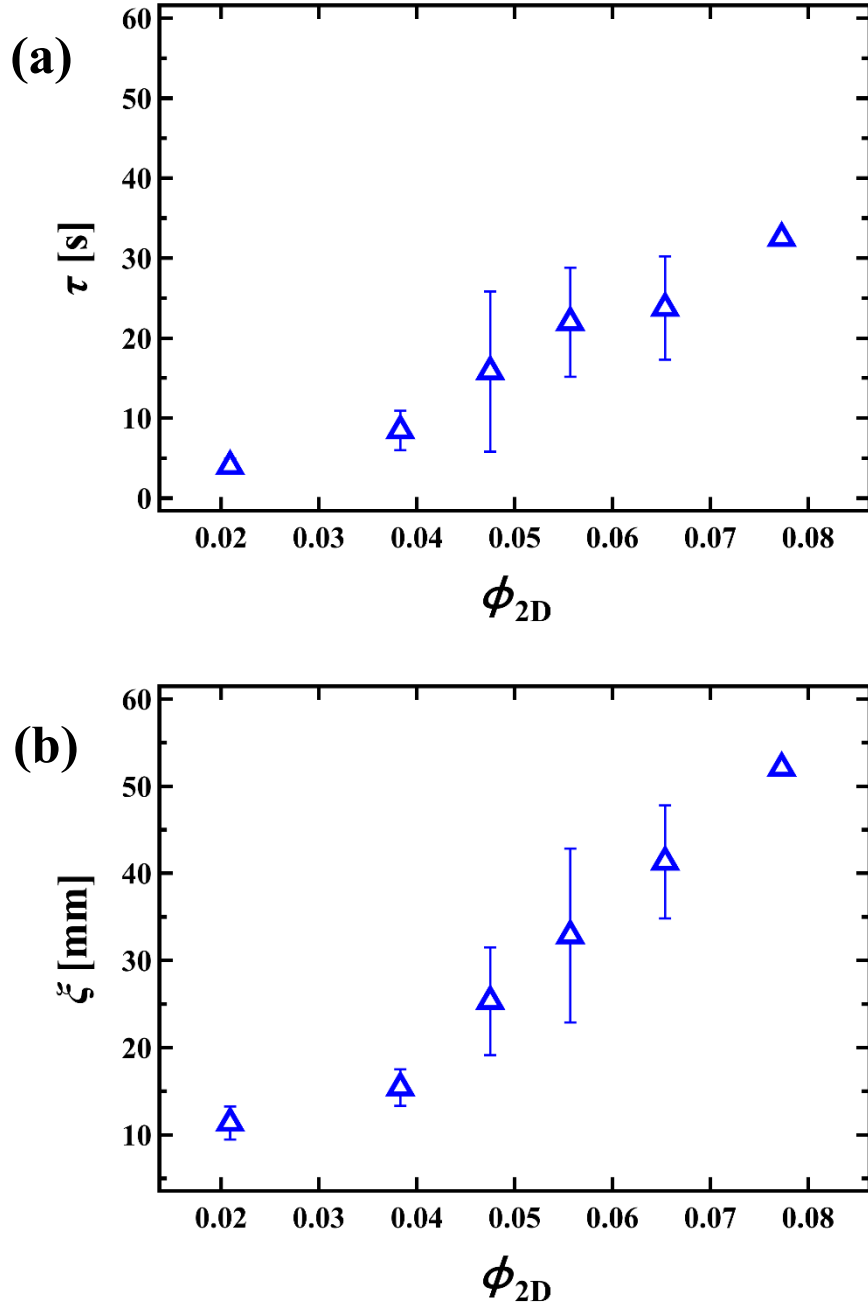

**Fig. S4.** (a) Mean relaxation time  $\tau$  and (b) the correlation length  $\xi$  of a single sequential rearrangement event averaged over several sequential rearrangements as a function of  $\phi_{2D}$ . It is found that both  $\tau$  and  $\xi$  increase continuously as  $\phi_{2D}$  increases.
